# Supplementary material for: A facile strategy of “laser-direct-writing” to develop self-supported Ni30B70–Ti catalysts for boosted and durable alkaline oxygen evolution
Source: Royal Society of Chemistry journal article supplement (doi:10.1039/d4se00230j), 2024-01-01
Supplement: d4se00230j1.pdf [file d4se00230j1.pdf]

Supporting information

**A facile strategy of "laser-direct-writing" to develop self-supported Ni<sub>30</sub>B<sub>70</sub>-Ti  
catalysts for boosted and durable alkaline oxygen evolution**

Yiming Gao<sup>a</sup>, Shengli Zhu<sup>a</sup>, Zhenduo Cui<sup>a</sup>, Zhaoyang Li<sup>a</sup>, Shuilin Wu<sup>a, b</sup>, Zhonghui Gao<sup>a</sup>, Wence Xu<sup>a</sup>, Meiqing Guo<sup>c</sup>, Yanqin Liang<sup>\*a</sup> and Hui Jiang<sup>\*a</sup>

<sup>a</sup> School of Materials Science and Engineering, Tianjin University, Tianjin 300072, China.

<sup>b</sup> School of Materials Science & Engineering, Peking University, Beijing, 100871, China.

<sup>c</sup> Institute of Applied Mechanics, College of Mechanical and Vehicle Engineering, Taiyuan University of Technology, Taiyuan 030024, China.

E-mail: [h.jiang@tju.edu.cn](mailto:h.jiang@tju.edu.cn); [yqliang@tju.edu.cn](mailto:yqliang@tju.edu.cn)

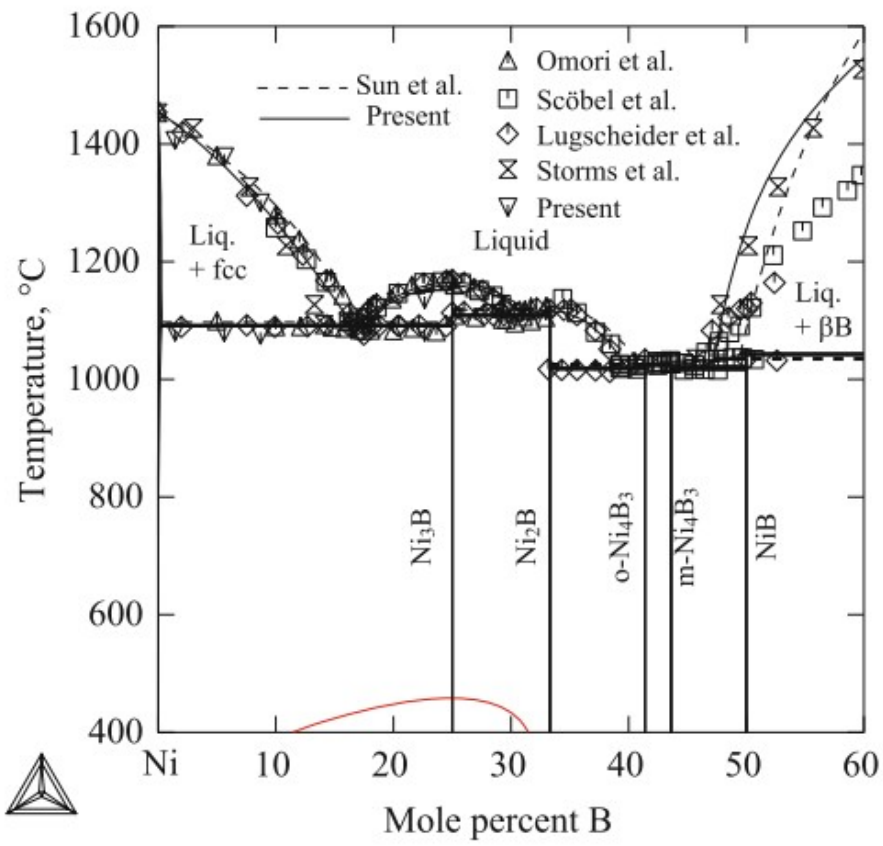

**Fig. S1** Ni-B phase diagram.<sup>1</sup>

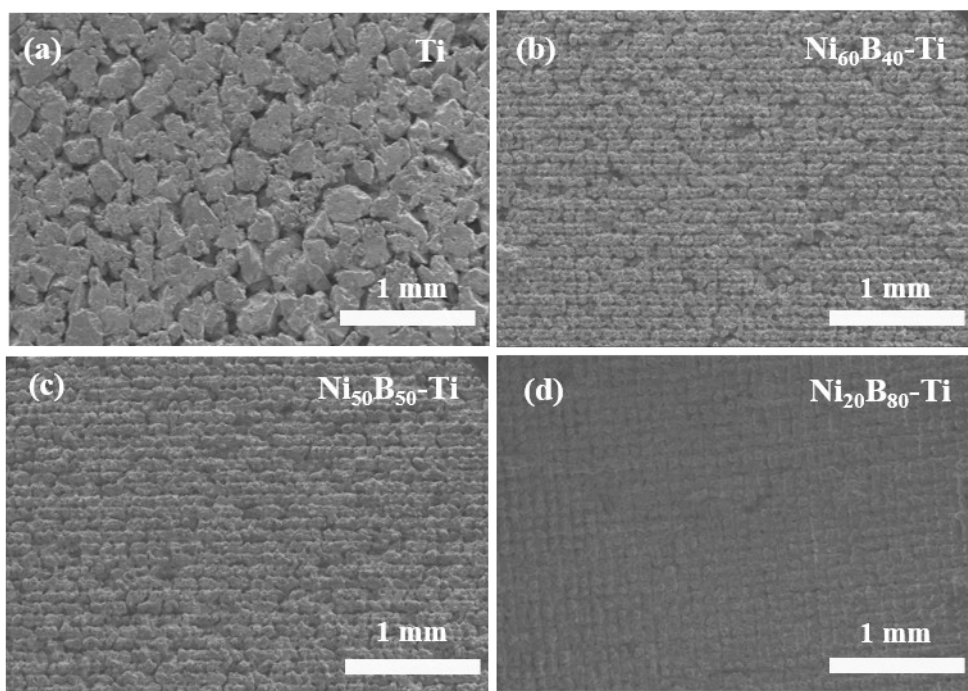

**Fig. S2** SEM images of (a) Ti foam, (b) Ni<sub>60</sub>B<sub>40</sub>-Ti, (c) Ni<sub>50</sub>B<sub>50</sub>-Ti and (d) Ni<sub>20</sub>B<sub>80</sub>-Ti at a magnification of 35 times.

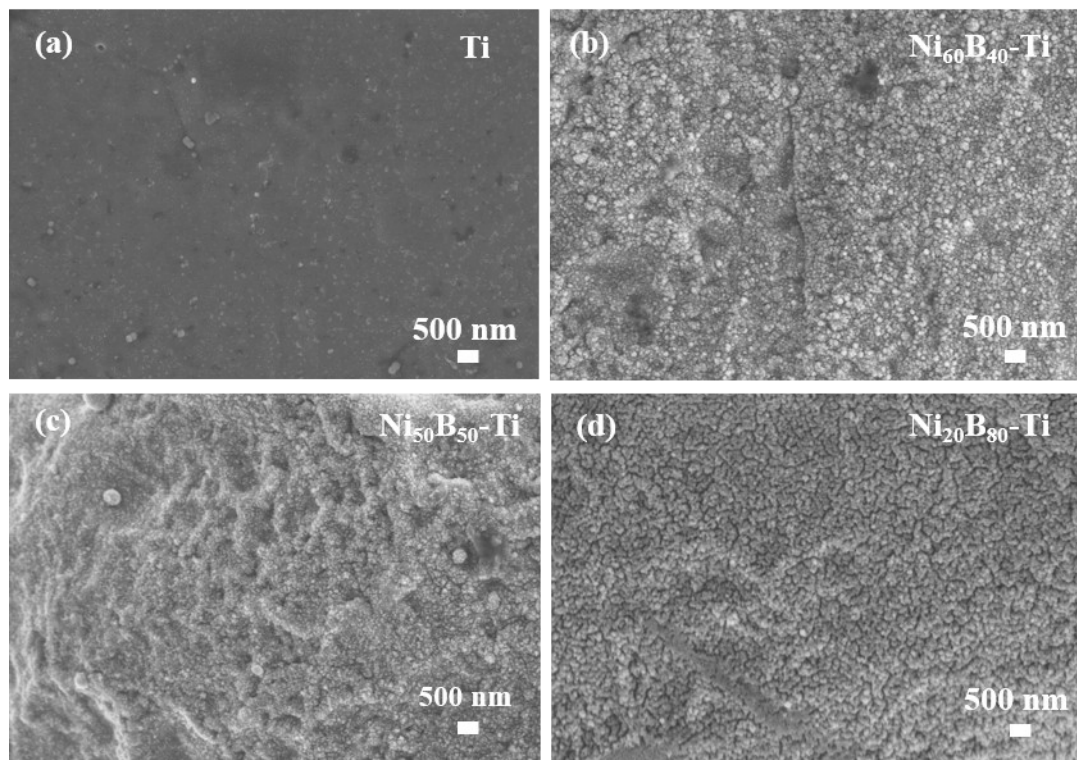

**Fig. S3** SEM images of (a) Ti foam, (b) Ni<sub>60</sub>B<sub>40</sub>-Ti, (c) Ni<sub>50</sub>B<sub>50</sub>-Ti, and (d) Ni<sub>20</sub>B<sub>80</sub>-Ti at a magnification of 10 K times.

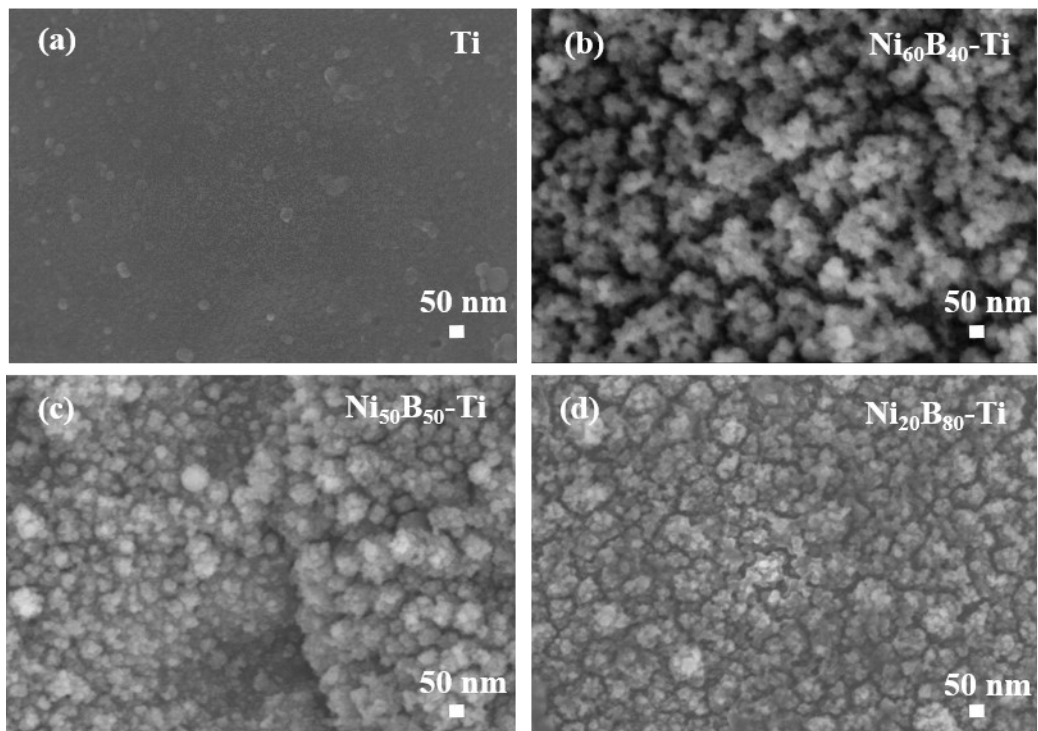

**Fig. S4** SEM images of (a) Ti foam, (b) Ni<sub>60</sub>B<sub>40</sub>-Ti, (c) Ni<sub>50</sub>B<sub>50</sub>-Ti, and (d) Ni<sub>20</sub>B<sub>80</sub>-Ti at a magnification of 60 K times.

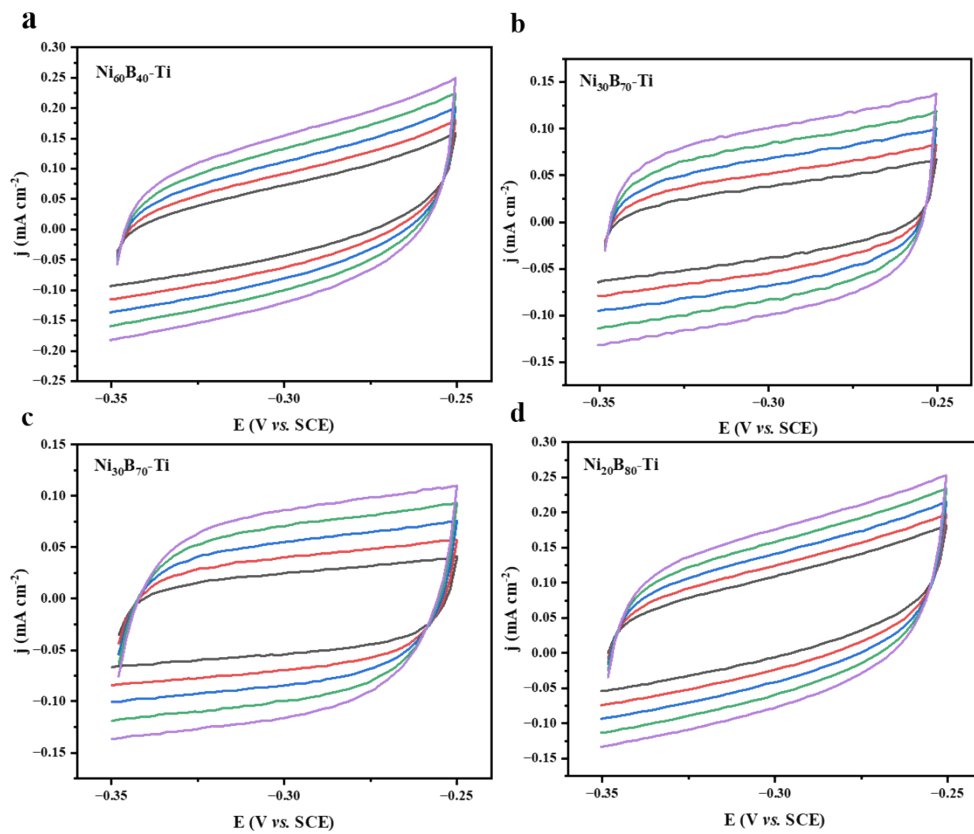

**Fig. S5** ECSA of (a)  $\text{Ni}_{60}\text{B}_{40}\text{-Ti}$ , (b)  $\text{Ni}_{50}\text{B}_{50}\text{-Ti}$ , (c)  $\text{Ni}_{30}\text{B}_{70}\text{-Ti}$ , and (d)  $\text{Ni}_{20}\text{B}_{80}\text{-Ti}$ .

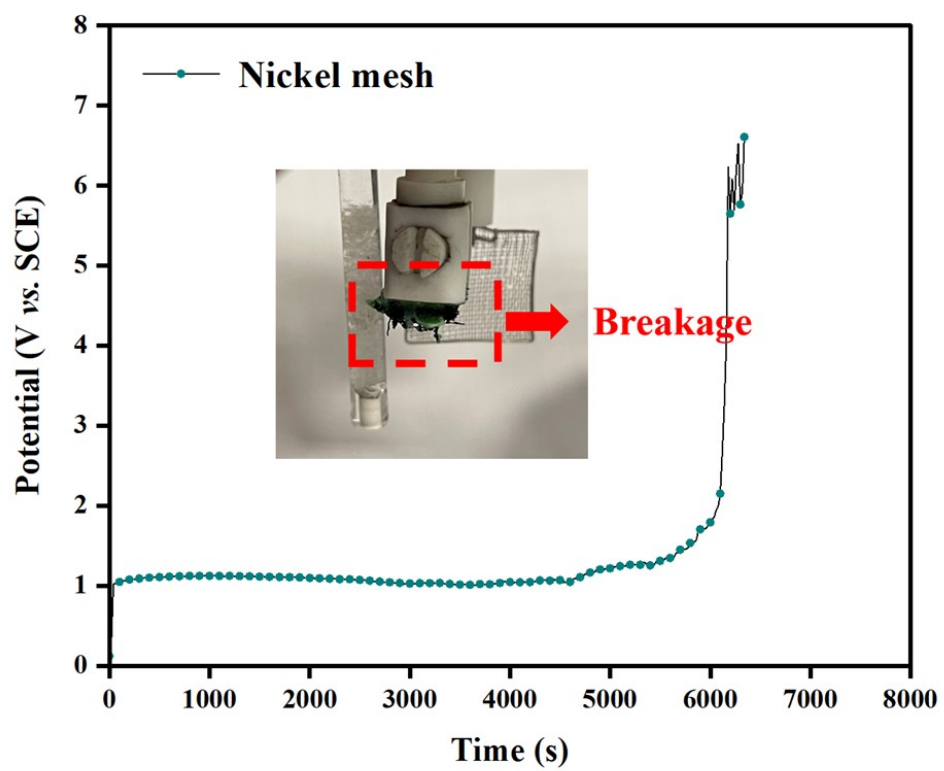

**Fig. S6** The commercial nickel network stability test in simulated seawater with a current density of  $100 \text{ mA cm}^{-2}$ .

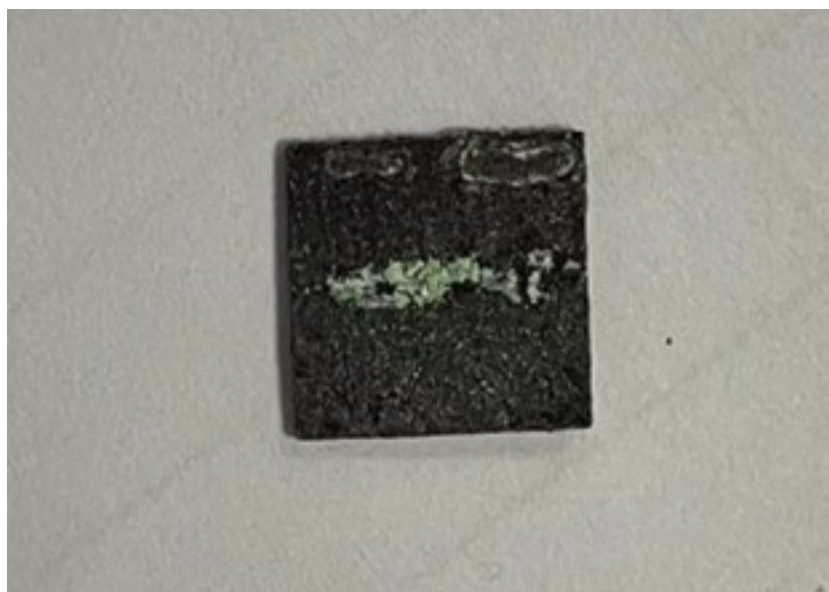

**Fig. S7** Image of the Ni<sub>30</sub>B<sub>70</sub>-Ti sample after the stability test at a current density of 100 mA cm<sup>-2</sup> in simulated seawater.



|                                         | $CPE_{1-T}/$<br>$(F \cdot cm^{-2})$ | $CPE_{1-P}/$<br>$(F \cdot cm^{-2})$ | $R_2(R_{ct})/$<br>$(\Omega \cdot cm^{-2})$ | $CPE_{2-T}/$<br>$(F \cdot cm^{-2})$ | $CPE_{2-P}/$<br>$(F \cdot cm^{-2})$ | $R_3/$<br>$(\Omega \cdot cm^{-2})$ |
|-----------------------------------------|-------------------------------------|-------------------------------------|--------------------------------------------|-------------------------------------|-------------------------------------|------------------------------------|
| <b>Ni<sub>60</sub>B<sub>40</sub>-Ti</b> | 1.14x10 <sup>-3</sup>               | 0.63                                | 0.36                                       | 0.26                                | 0.48                                | 1.07                               |
| <b>Ni<sub>50</sub>B<sub>50</sub>-Ti</b> | 1.38x10 <sup>-3</sup>               | 0.86                                | 0.34                                       | 0.31                                | 0.22                                | 1.05                               |
| <b>Ni<sub>30</sub>B<sub>70</sub>-Ti</b> | 5.12x10 <sup>-4</sup>               | 0.93                                | 0.10                                       | 0.30                                | 0.45                                | 0.49                               |
| <b>Ni<sub>20</sub>B<sub>80</sub>-Ti</b> | 7.12x10 <sup>-4</sup>               | 0.82                                | 0.19                                       | 0.32                                | 0.39                                | 0.66                               |

**Table S1.** The value of the fitted components in the equivalent circuit for Ni<sub>60</sub>B<sub>40</sub>-Ti, Ni<sub>50</sub>B<sub>50</sub>-Ti, Ni<sub>30</sub>B<sub>70</sub>-Ti, and Ni<sub>20</sub>B<sub>80</sub>-Ti.

Some calculation formulas involved in the article:

The overpotential is calculated by the following equation:

$$E \text{ (vs. RHE)} = E \text{ (vs. SCE)} + 1.0672 \text{ V}$$

$$\eta_{\text{OER}} = E \text{ (vs. RHE)} - 1.23 \text{ V}$$

The ECSA is calculated by the following equation:

$$\text{ECSA} = C_{\text{dl}}/C_{\text{s}}(40 \mu\text{F cm}^{-2})$$

$C_{\text{dl}}$  can be obtained by testing CV curves at different sweep speeds in non-Faraday intervals, and thus ECSA value can be obtained.

The electric quantity of Ni reduction is calculated by the following equation:

$$Q = \frac{\int j \cdot dt}{m(\text{Ni})}$$

$\int j \cdot dt$  is obtained by the integration of the j-t curve.  $m(\text{Ni})$  is obtained by multiplying the catalyst net mass by the mass percentage of the Ni element in EDS.

The Tafel is calculated by the following equation:

$$\eta = a + b \lg j$$

The Tafel curve can be obtained by plotting the logarithm of the current density against the electrode potential. The linear part of the curve is selected, and the Tafel slope is obtained by fitting its slope.

## References

1. K. Oikawa and N. Ueshima, *J. Phase Equilib. Diff.*, 2022, **43**, 814-826.
